# Supplementary material for: Development of eco-friendly pretreatment processes for high-purity silicon recovery from end-of-life photovoltaic modules
Source: Royal Society of Chemistry journal article supplement (doi:10.1039/d4ra04878d), 2024-01-01
Supplement: d4ra04878d1.pdf [file d4ra04878d1.pdf]

## Supporting Information

### **Eco-friendly and Efficient Processes for Silicon Powder Recovery from End-of-life Photovoltaic Modules**

*Suhwan Kim<sup>1+</sup>, Junki Kim<sup>3+</sup>, Seyeon Cho<sup>1</sup>, Kwangmin Seo<sup>2</sup>, Byoung-Uk Park<sup>3</sup>, Haesuk Lee<sup>4</sup> and Jongsung Park<sup>1\*</sup>*

*<sup>1</sup> Department of Energy Engineering, Future Convergence Technology Research Institute, Gyeongsang National University, Jinju, Gyeongsangnam-do 52828, Republic of Korea*

*<sup>2</sup> WonKwang S&T Co., Ltd, Incheon 22845, Republic of Korea*

*<sup>3</sup> Chungbuk Technopark, Next Generation Energy Center, Cheongju, Chuncheongbuk-do 28116, Republic of Korea*

*<sup>4</sup> Department of Integrative Energy Engineering, Korea University, Seoul 02841, Republic of Korea*

**\*Corresponding Author:** [j.park@gnu.ac.kr](mailto:j.park@gnu.ac.kr) (Prof. J. Park)

**Table S1.** Weight loss temperature and percentage compared to Reclaimed Si after WGS process using D.I. water, HNO<sub>3</sub>, and NaCl 15 wt% aqueous solution

| Sample                           | Weight (mg)   | Weight loss temperature (°C) and percentage |                                       |                             |                                       |
|----------------------------------|---------------|---------------------------------------------|---------------------------------------|-----------------------------|---------------------------------------|
|                                  |               | Total                                       | 1st                                   | 2nd                         | 3rd                                   |
| D.I water<br>5k rpm_10min        | 10.446        | 20.472%                                     | 239.9<br>~389.8<br>(3.944%)           | 392.8<br>~465.0<br>(9.026%) | 466.1<br>~545.4<br>(7.137%)           |
| HNO <sub>3</sub><br>5k rpm_10min | 2.739         | 32.448%                                     | 301.9<br>~377.2<br>(2.403%)           | 382.8~521.9<br>(29.741%)    |                                       |
| NaCl 15 wt%<br>5k rpm_10 min     | <b>10.907</b> | <b>3.808%</b>                               | <b>307.3~450.4</b><br><b>(0.465%)</b> |                             | <b>451.5~513.3</b><br><b>(3.343%)</b> |
| Reclaimed<br>Si powder           | 18.29         | 27.936 %                                    | 265.0 ~399.1<br>(6.112%)              |                             | 408.7~540.3<br>(21.824%)              |

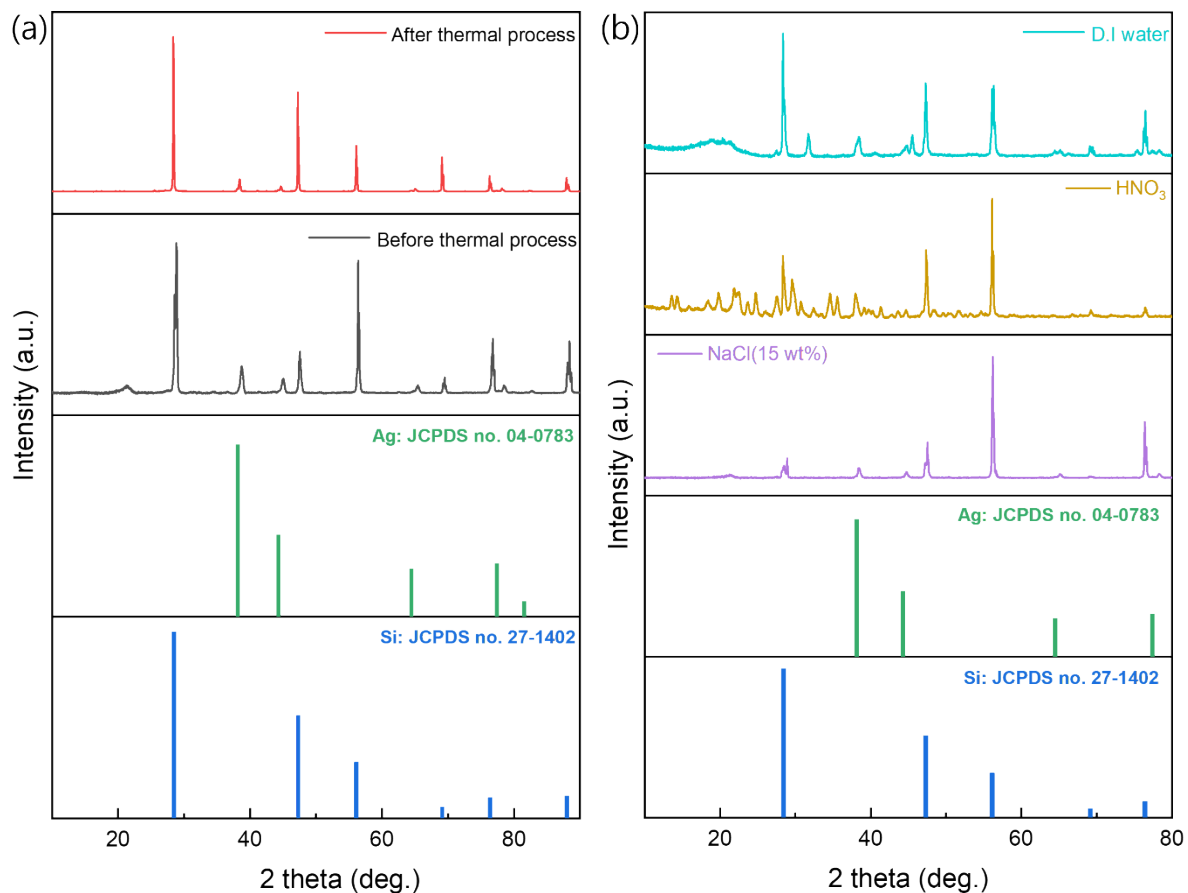

Fig. S1. XRD results after (a) thermal process and (b) WGS process using various solutions

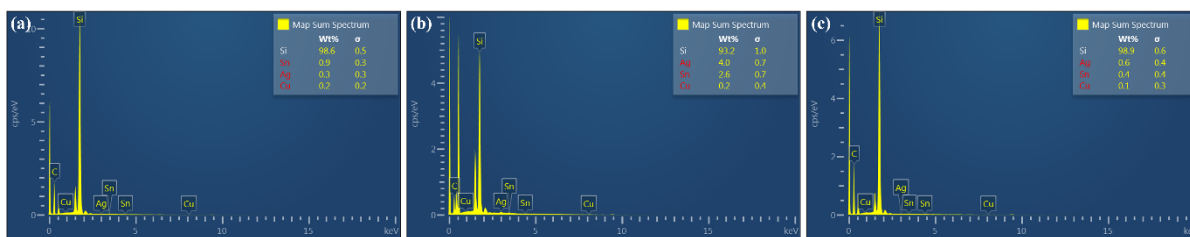

Fig. S2. EDS measurement results after the WGS process using (a) D.I. water, (b)  $\text{HNO}_3$ , and (c) NaCl 15 wt% aqueous solution
